# Supplementary material for: Exploring the Potential Performance of Fibroscan for Predicting and Evaluating Metabolic Syndrome using a Feature Selected Strategy of Machine Learning
Source: MDPI journal article supplement (doi:10.3390/metabo13070822), 2023-07-05
Supplement: s1 [file s1]

**Table S1.** Stages of two scores from Fibroscan

| Parameter/Stage | Stage 1 | Stage 2 | Stage 3  | Stage 4 |
|-----------------|---------|---------|----------|---------|
| CAP score       | S0      | S1      | S2       | S3      |
|                 | 100-238 | 238-260 | 260-290  | >290    |
| E score         | F0-F1   | F2      | F3       | F4      |
|                 | 2-7     | 7-9.5   | 9.5-12.5 | >12.5   |

**Table S2.** Confusion matrix for machine learning performance criteria

| 2x2 table     | True Reference Yes | True Reference No |
|---------------|--------------------|-------------------|
| Predicted Yes | A (TP)             | B (FP)            |
| Predicted No  | C (FN)             | D (TN)            |

TP: True positive; TN: true negative; FP: false positive; FN: false negative

The formulas of each criterion used in caret package in R programming are as follows:

$$\text{Sensitivity} = A/(A + C), \quad (1)$$

$$\text{Specificity} = D/(B + D) \quad (2)$$

$$\text{Prevalence} = (A + C)/(A + B + C + D) \quad (3)$$

$$\text{PPV} = (\text{sensitivity} * \text{prevalence}) / ((\text{sensitivity} * \text{prevalence}) + ((1 - \text{specificity}) * (1 - \text{prevalence}))), \quad (4)$$

$$\text{NPV} = (\text{specificity} * (1 - \text{prevalence})) / (((1 - \text{sensitivity}) * \text{prevalence}) + ((\text{specificity}) * (1 - \text{prevalence}))), \quad (5)$$

$$\text{Detection Rate} = A/(A + B + C + D), \quad (6)$$

$$\text{Detection Prevalence} = (A + B)/(A + B + C + D), \quad (7)$$

$$\text{Balanced Accuracy} = (\text{sensitivity} + \text{specificity})/2, \quad (8)$$

$$\text{Precision} = A/(A + B), \quad (9)$$

$$\text{Recall} = A/(A + C), \quad (10)$$

$$F1 = (1 + \text{beta}^2) * \text{precision} * \text{recall} / ((\text{beta}^2 * \text{precision}) + \text{recall}) \quad (11)$$

,where beta = 1 for this function.

**Table S3.** Summary of parameters of machine learning model available in caret package in R

| Model                 | Method Value | Type                       | Libraries          | Tuning Parameters          |
|-----------------------|--------------|----------------------------|--------------------|----------------------------|
| LDA                   | lda          | Classification             | MASS               | None                       |
| Bagged decision trees | treebag      | Classification, Regression | ipred, plyr, e1071 | None                       |
| Random Forest         | rf           | Classification, Regression | randomForest       | mtry                       |
| Logistic Regression   | glm          | Classification, Regression | base               | family = "binomial"        |
| NaïveBayes            | naive_bayes  | Classification             | naivebayes         | laplace, usekernel, adjust |
| Neural Network        | nnet         | Classification, Regression | nnet               | size, decay                |
| SVM                   | svmLinear    | Classification, Regression | kernlab            | C                          |
| CART                  | rpart        | Classification, Regression | rpart              | cp                         |

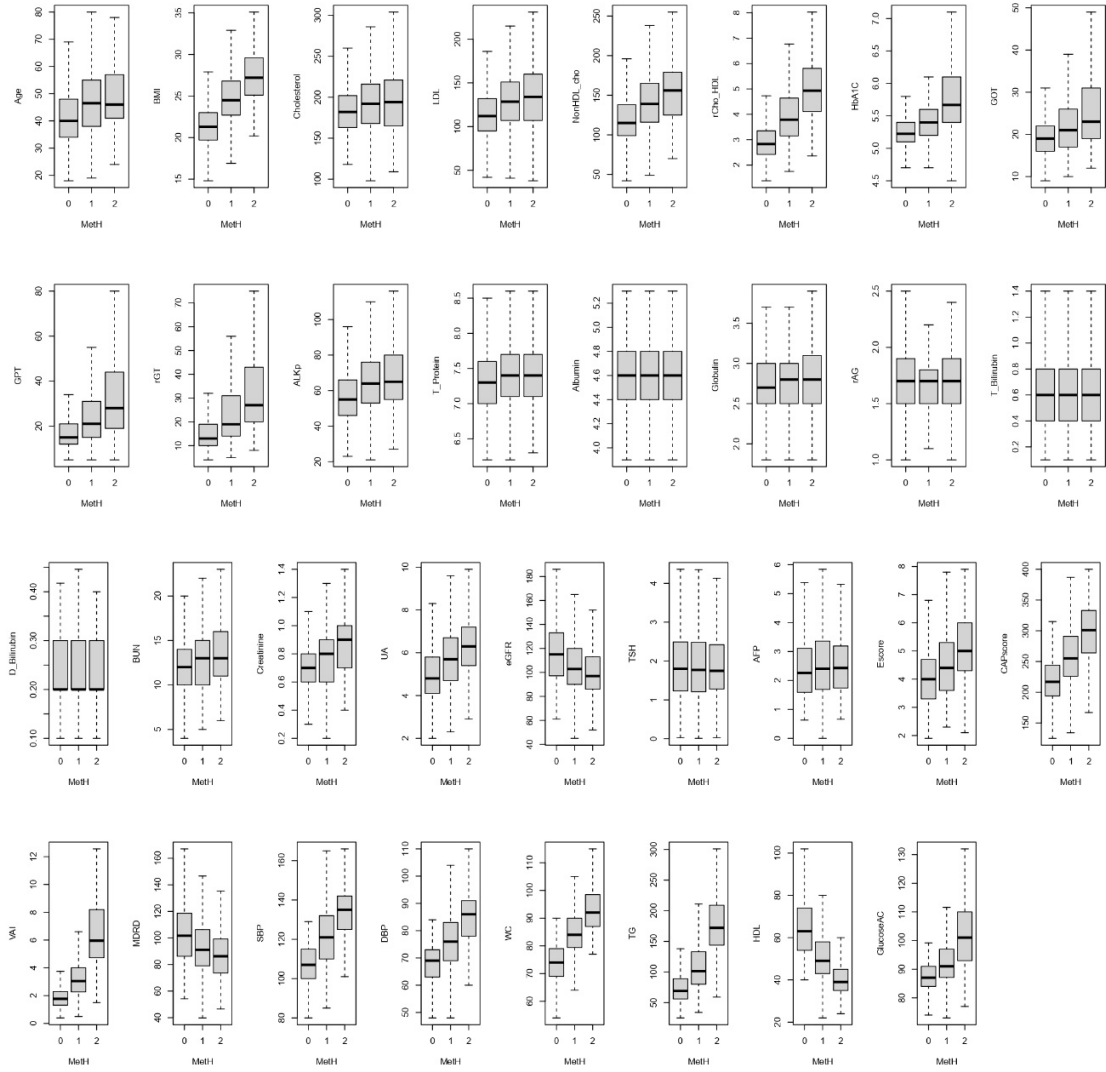

**Figure S1.** The box plot depicts the difference between different conditions of MetS patients with whole clinical biomarkers without outliers.

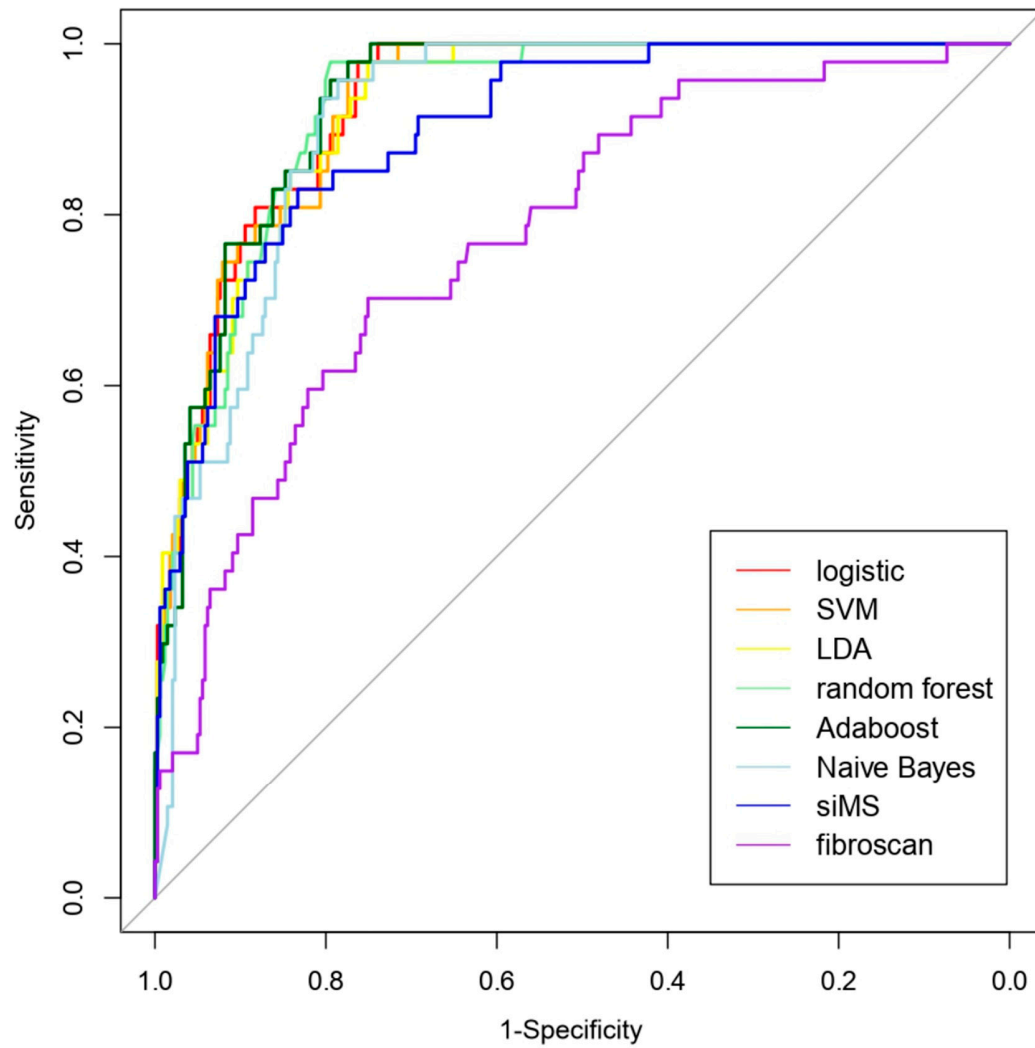

**Figure S2.** The receiver operating characteristic curve of various AI machine learnings methods compared with other traditional scoring models.
